# Supplementary material for: A Virtual Retina for Studying Population Coding
Source: PubMed Central journal article supplement (PMC3544815; doi:10.1371/journal.pone.0053363), 2013-01-14

## Figure S8

**Raster plots for all cells viewing the stimulus set consisting of drifting gratings that varied in spatial frequency (n=120 cells).** The stimulus is a continuous stream of drifting gratings with uniform gray fields interleaved (grating stimuli are 1 s, gray fields are 0.33 s). 5 s of a 41 s stimulus is shown (repeated 50 times). The vertical axis indicates the trials; 0 to 50 trials are shown for the real cell, followed by 0 to 50 trials for the model cell, following the layout in Figure 8 in the main text. The order of the rasters corresponds to the order of the posteriors in Figure S2.

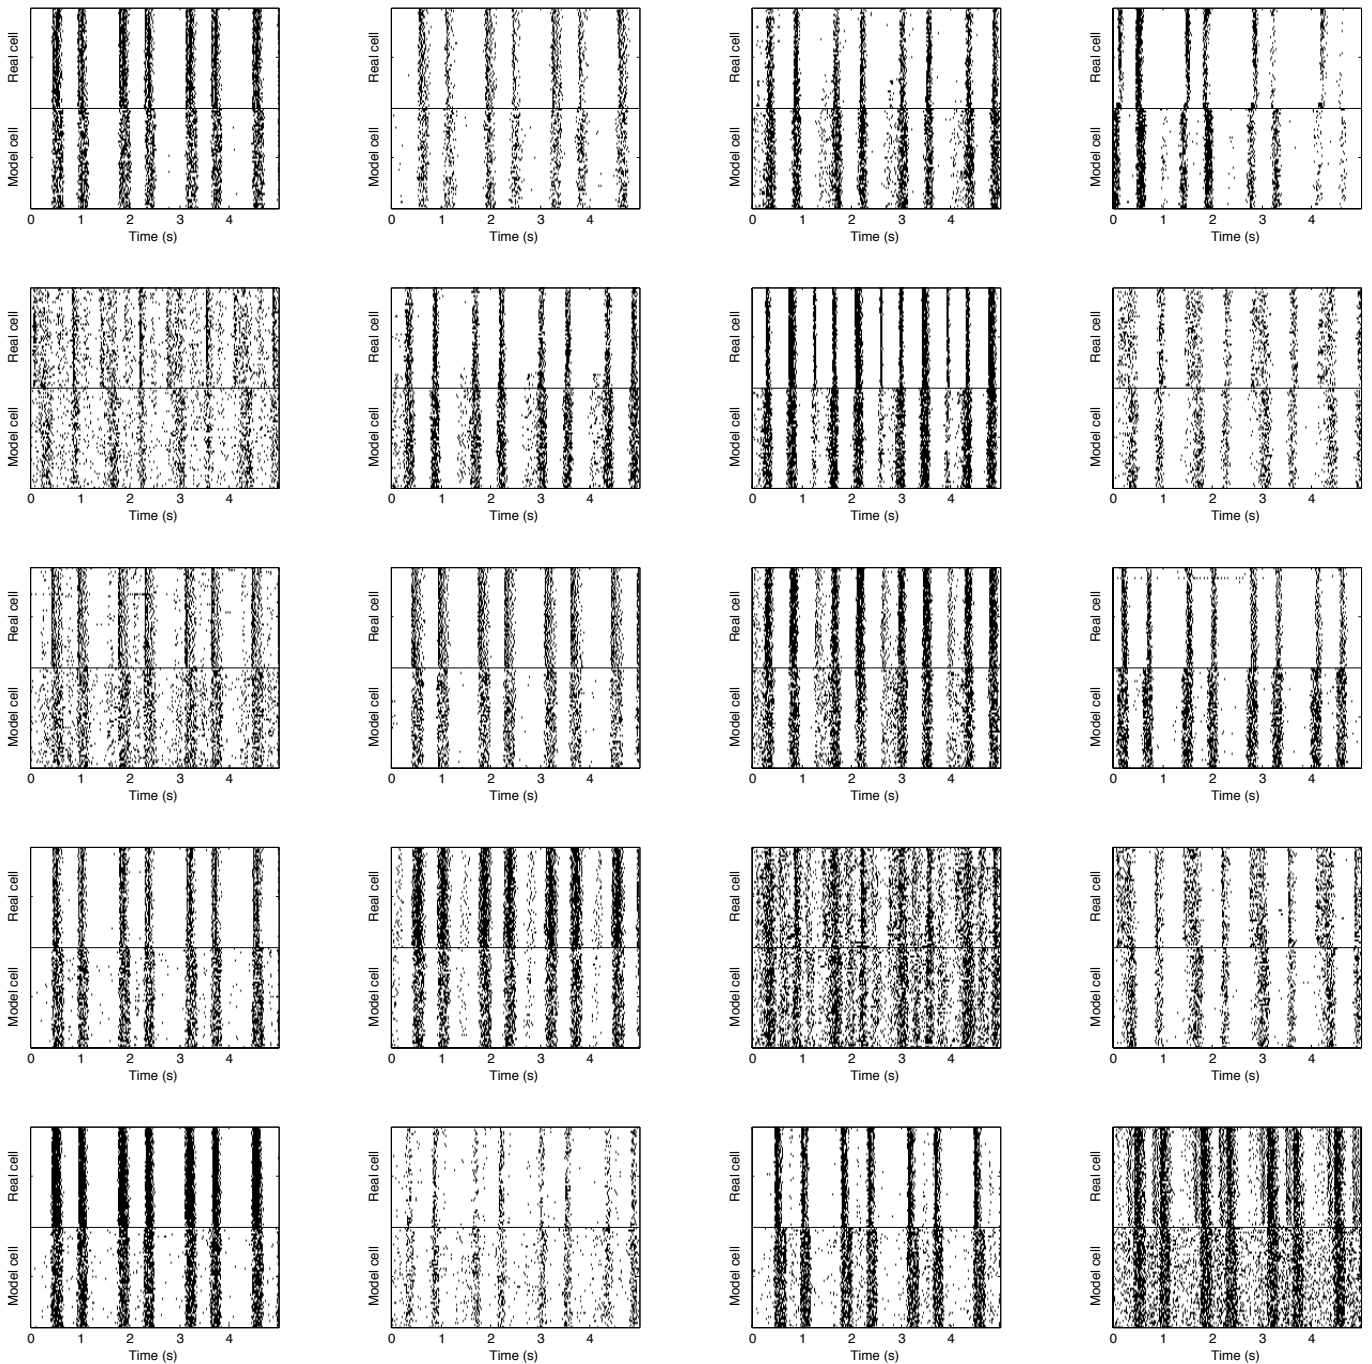



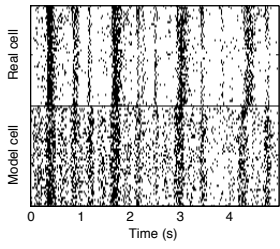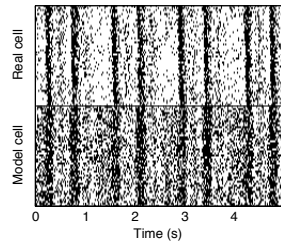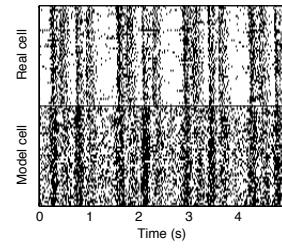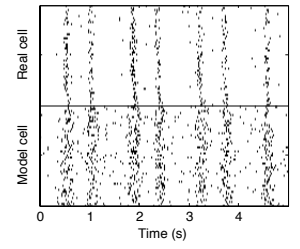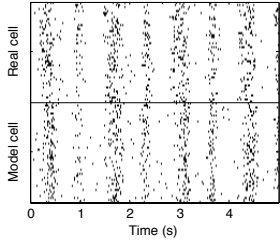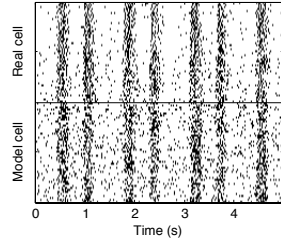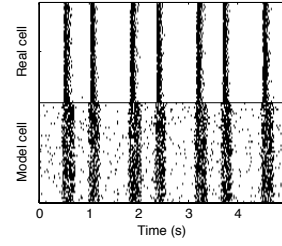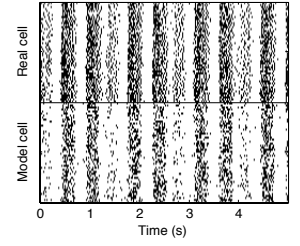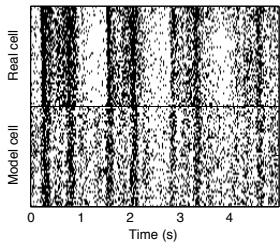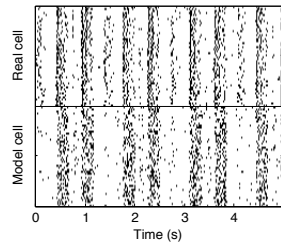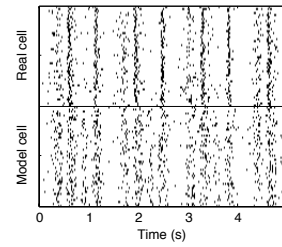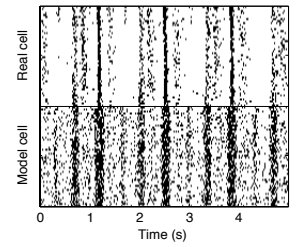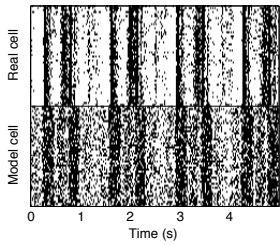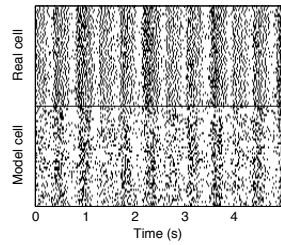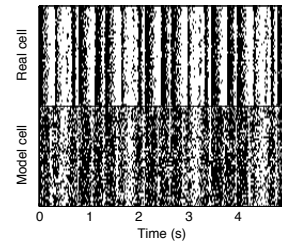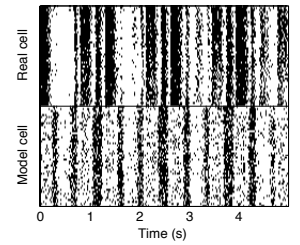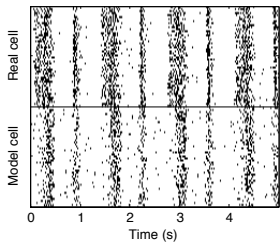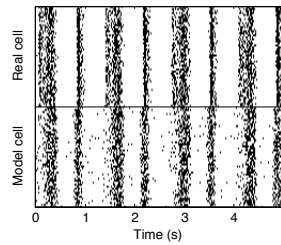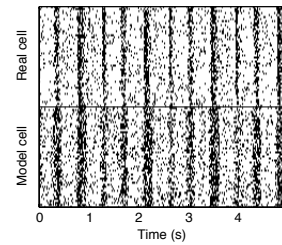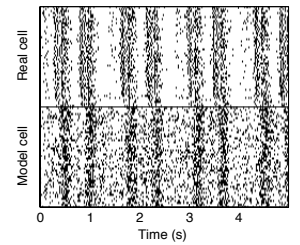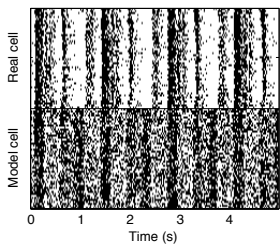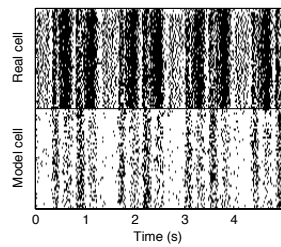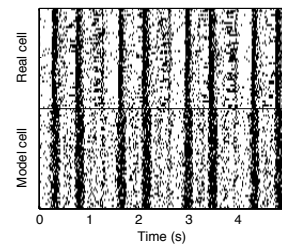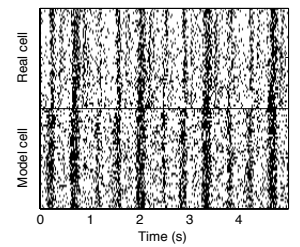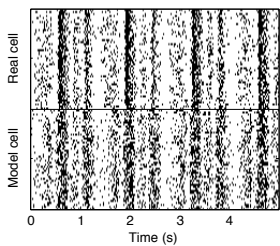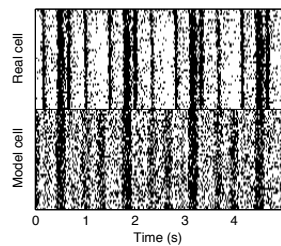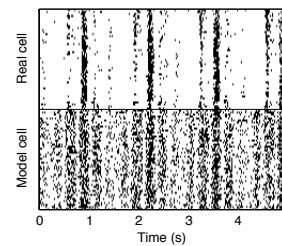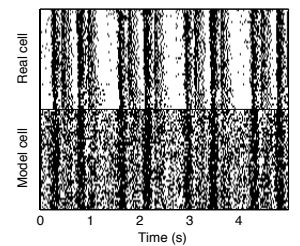

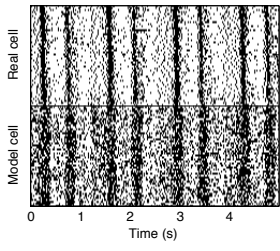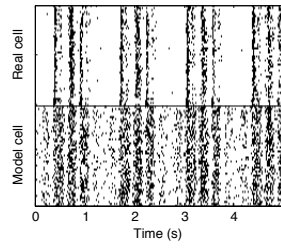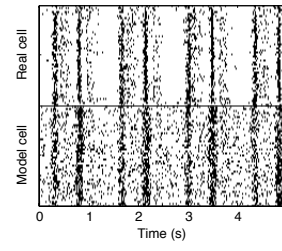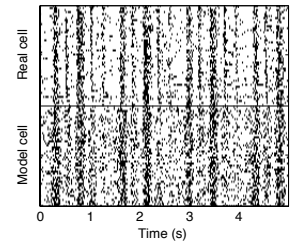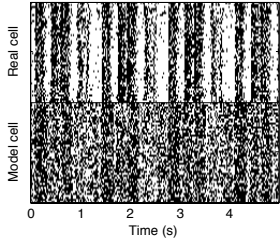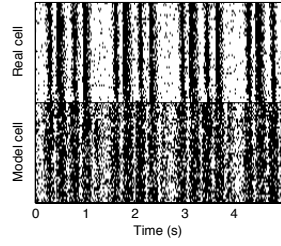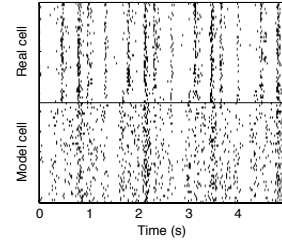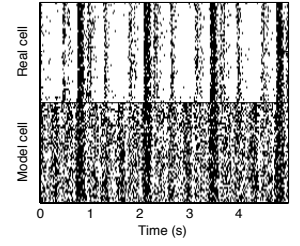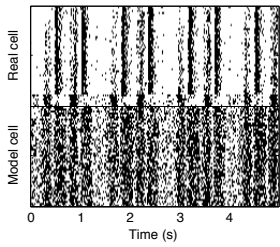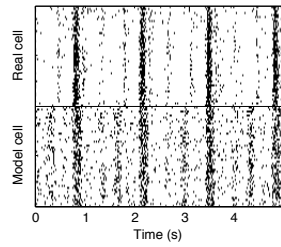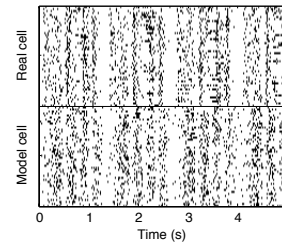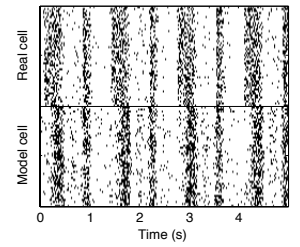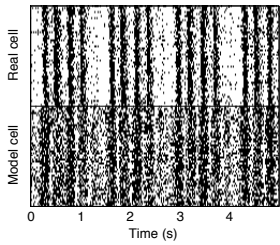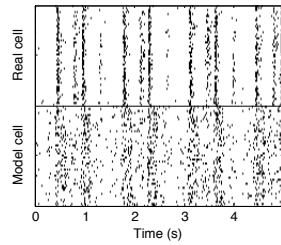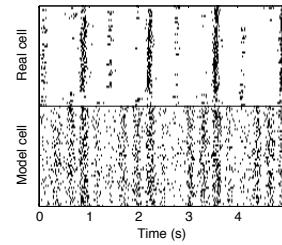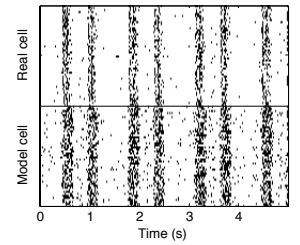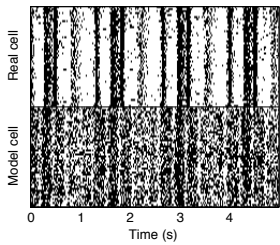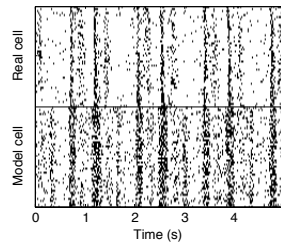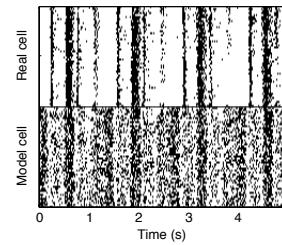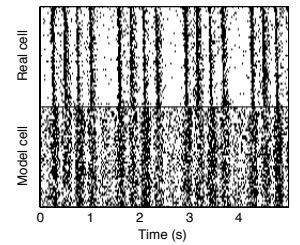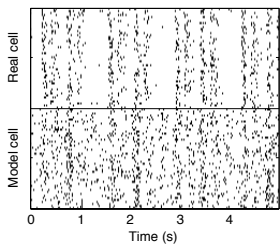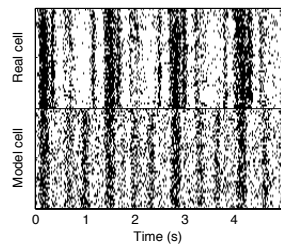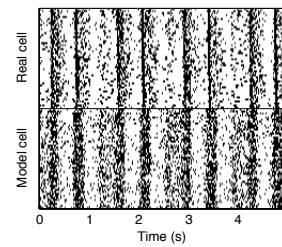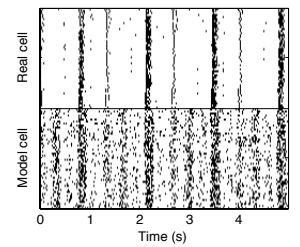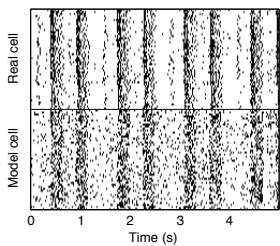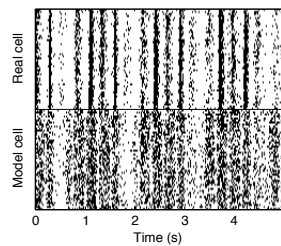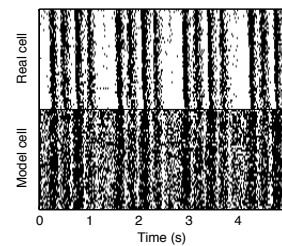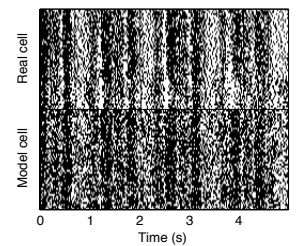

Supplement: pone.0053363.s008.pdf [file pone.0053363.s008.pdf]
