# Supplementary material for: A Virtual Retina for Studying Population Coding
Source: PLOS journal article supplement (doi:10.1371/journal.pone.0053363), 2013-01-14
Supplement: S1 (10.1371/journal.pone.0053363.s001) [file journal.pone.0053363.s001]

# Figure S1

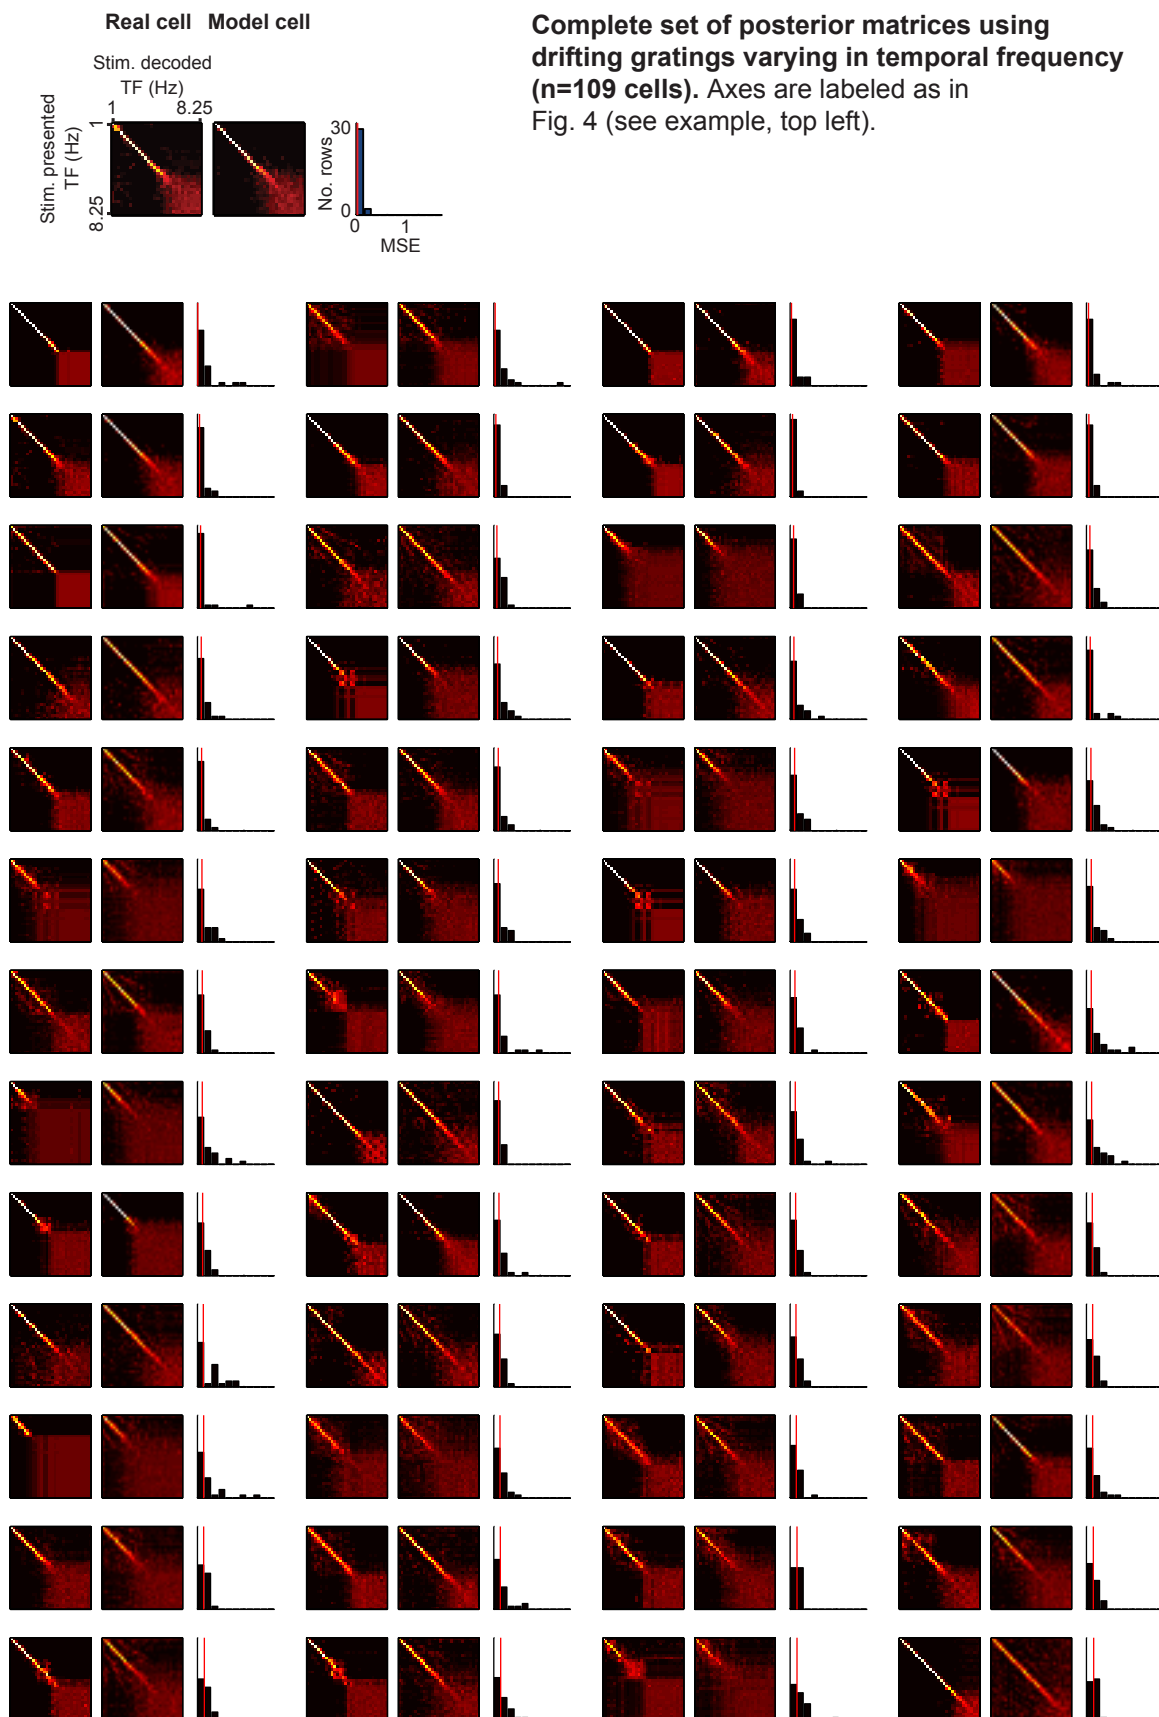

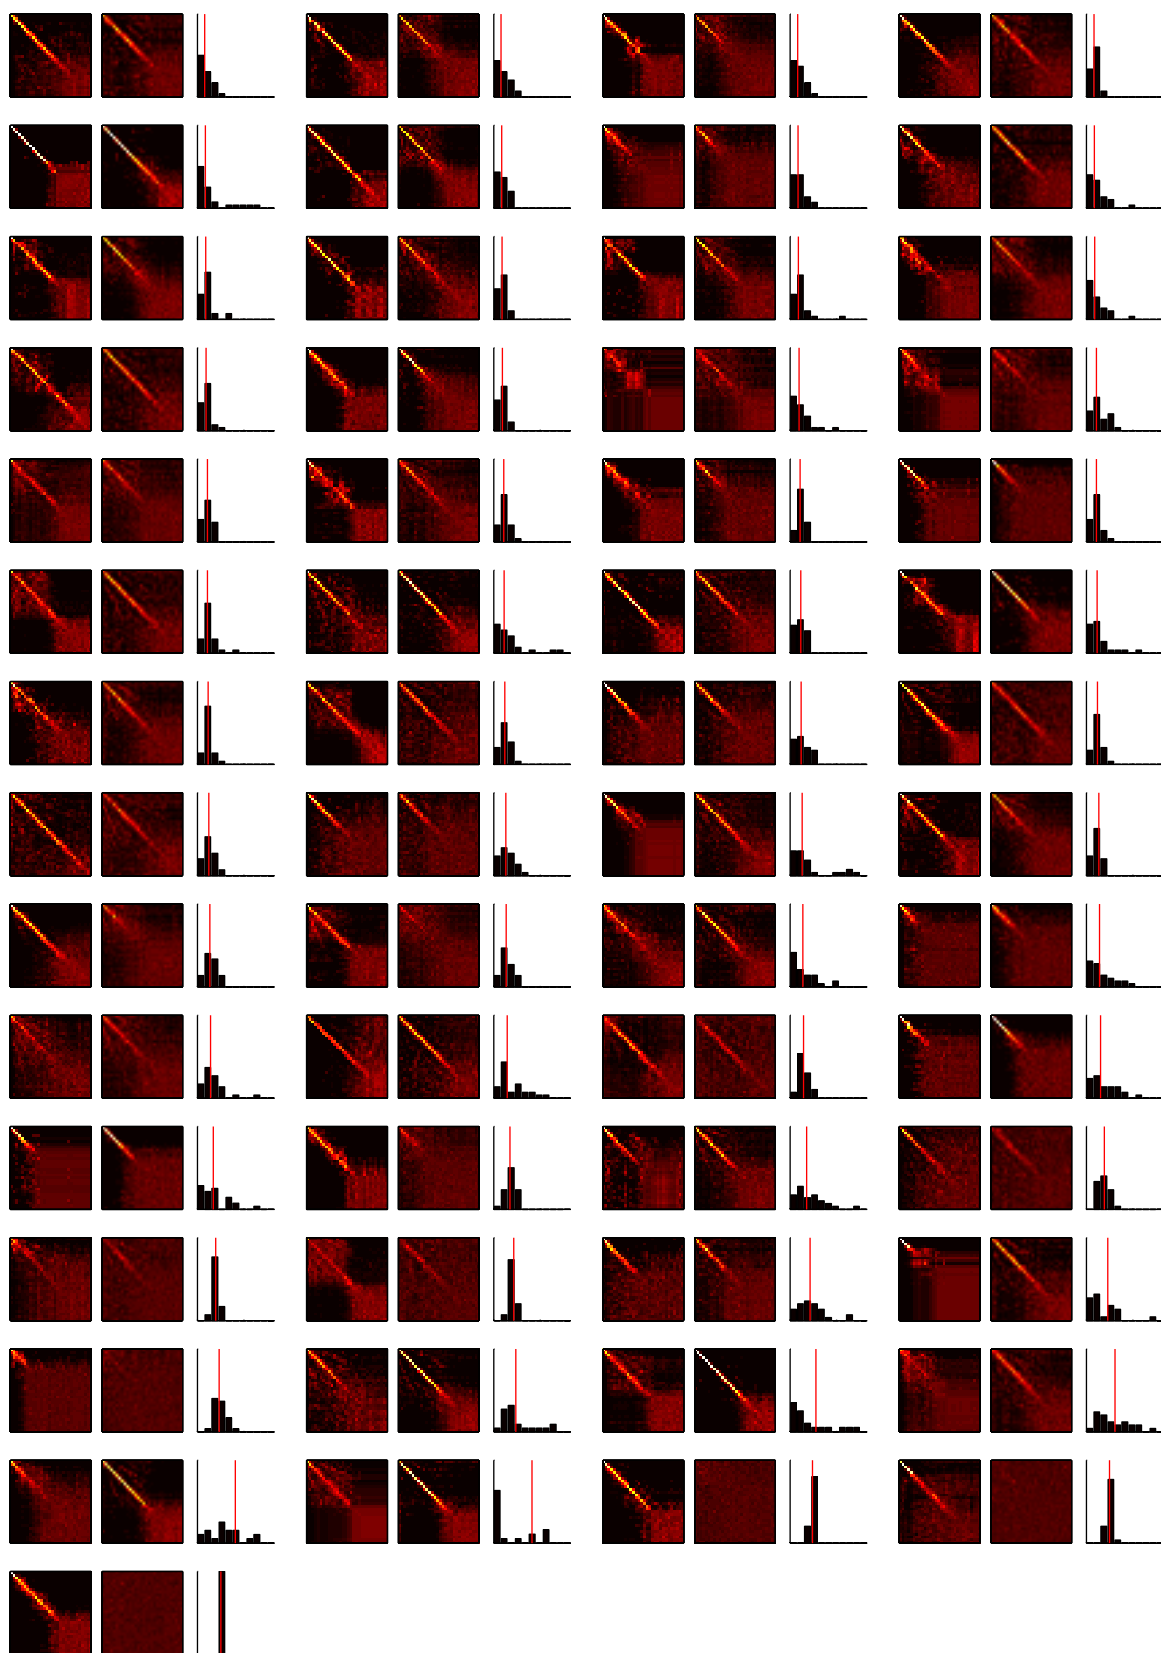

**Figure S1. The complete set of posterior stimulus distributions (matrices) when the stimulus set consisted of drifting gratings that varied in temporal frequency; this is the complete set referred to in Fig. 4, left column ( $n=109$  cells).**
